# Supplementary material for: Thermally induced phase separation in levitated polymer droplets
Source: Royal Society of Chemistry journal article supplement (doi:10.1039/c6cp06283k), 2016-01-01
Supplement: c6cp06283k1.pdf [file c6cp06283k1.pdf]

### Supplementary material:

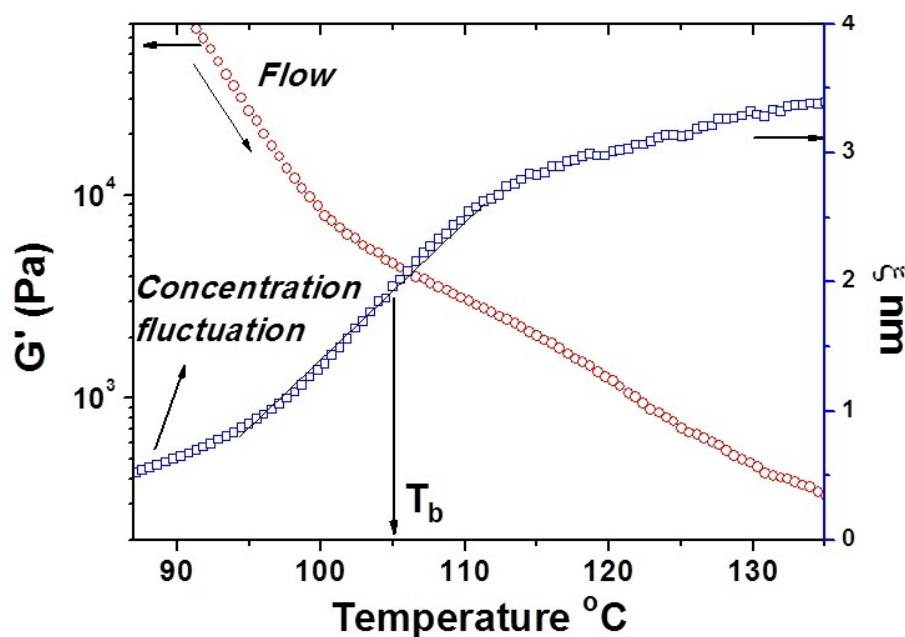

Fig. S1 Variation of storage modulus ( $G'$ ) and correlation length ( $\xi$ ) as a function temperature by oscillatory shear rheology at heating rate 0.5 K/min;  $\omega=1$  rad/s; shear rate =1%.

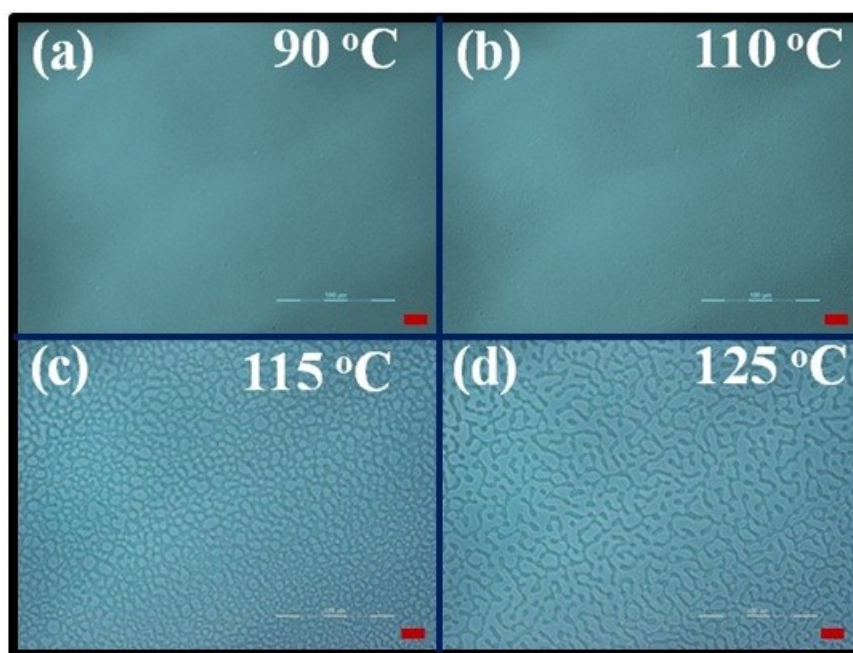

Fig. S2 Polarized Optical Microscopy images of PS/PVME 60/40 blend bulk phase separation under quiescent condition with heating 1 K/min (a) 90  $^{\circ}\text{C}$  -miscible state (b) 110  $^{\circ}\text{C}$  - onset of phase separation (c) 115  $^{\circ}\text{C}$  (d) 125  $^{\circ}\text{C}$  [scale : 20  $\mu\text{m}$ ].

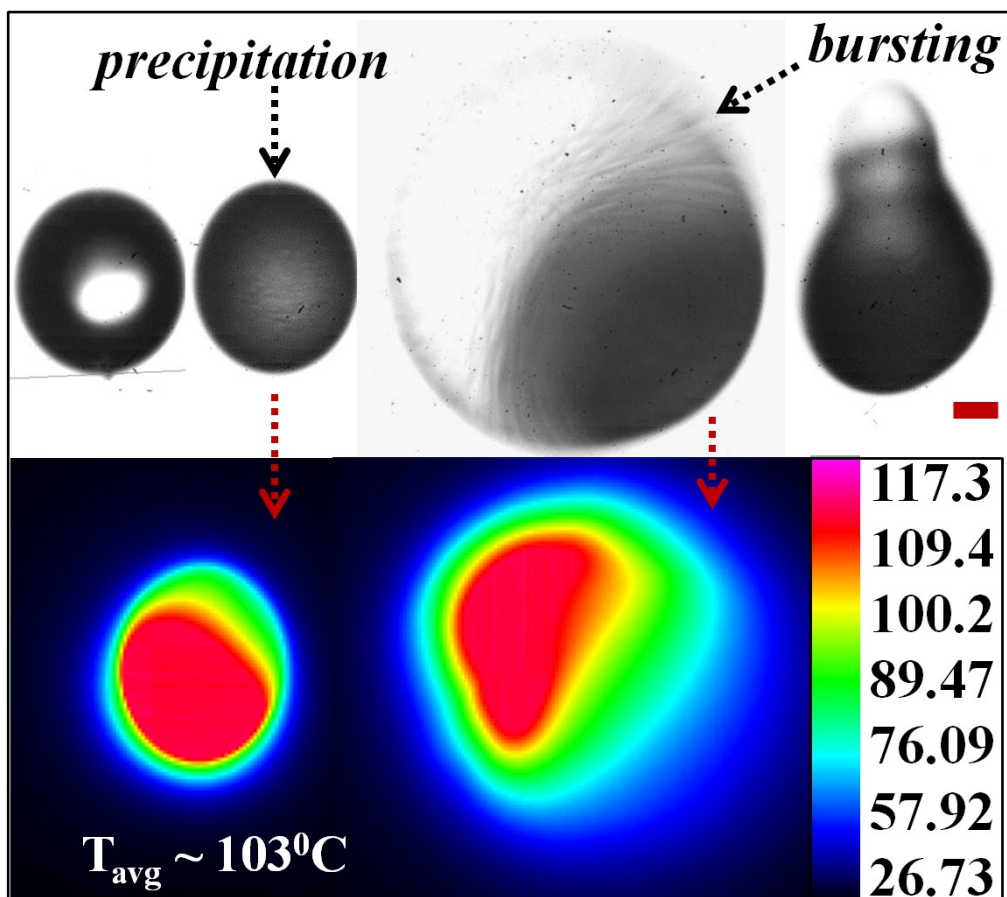

Fig. S3 High speed images along with the corresponding IR thermographic images showing the dynamics of PS/PVME droplets heated at high laser power,  $I = 0.208 \text{ MW}$ .

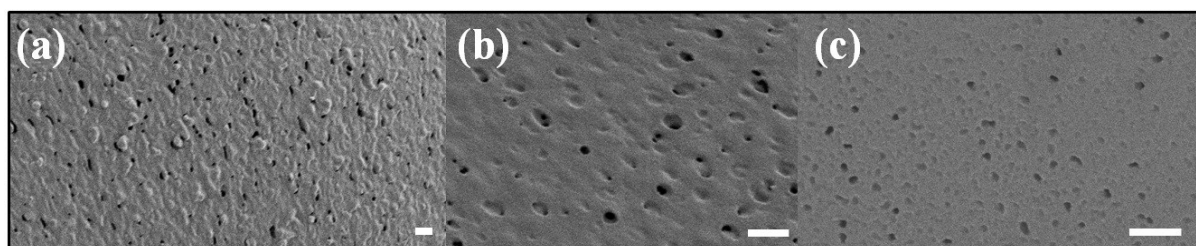

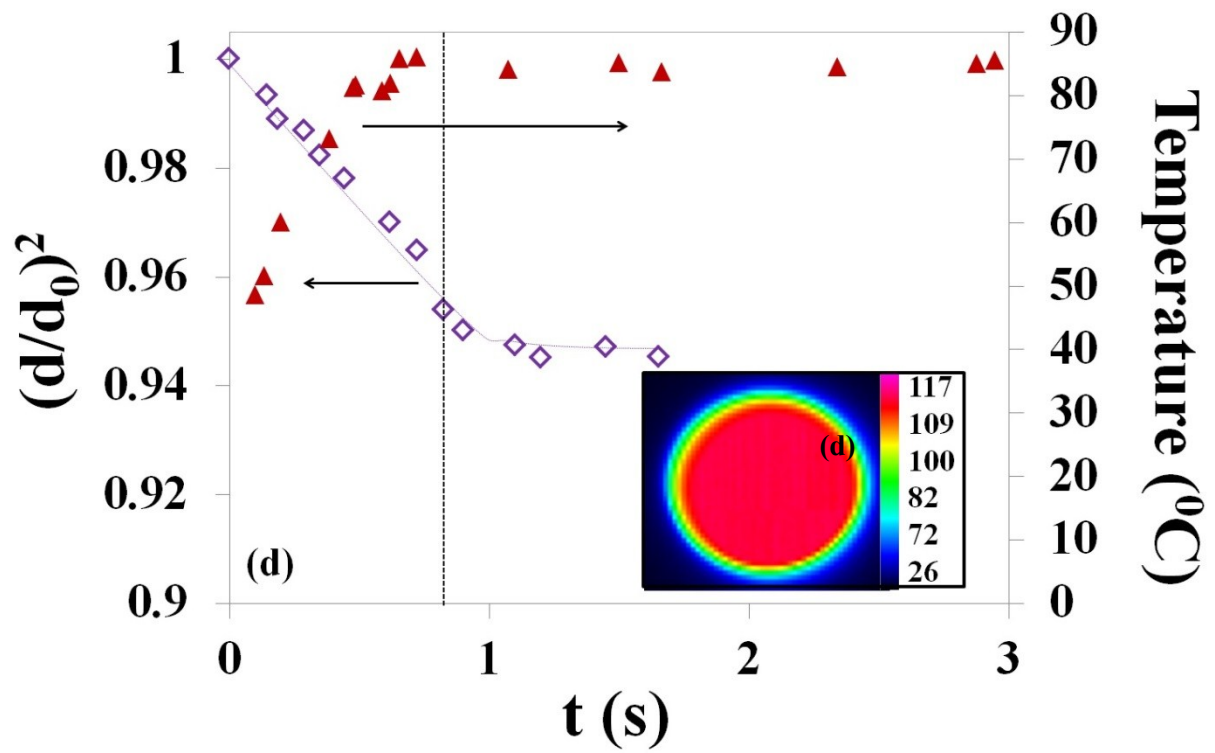

Fig. S4 SEM images showing final structures of (a) droplets of 20% (wt.) PS/PVME in toluene (at  $I=0.104\text{MW/m}^2$ ), (b) PS/PVME (without toluene) at  $85^\circ\text{C}$ , (c) 30% (wt.) PS/PVME in toluene (at  $I=0.104\text{MW/m}^2$ ) [scale bar is  $2\ \mu\text{m}$ ] and (d) temporal variation of droplet size (20% wt. of PS/PVME in toluene) and temperature (at  $I=0.104\text{MW/m}^2$ ).
